# Supplementary material for: Intestinal epithelial BLT1 promotes mucosal repair
Source: PubMed Central journal article supplement (PMC9746898; doi:10.1172/jci.insight.162392), 2022-12-08
Supplement: jciinsight-7-162392-s050.pdf [file jciinsight-7-162392-s050.pdf]

**Fig. S1. BLT1 functions as an epithelial receptor for RvE1**

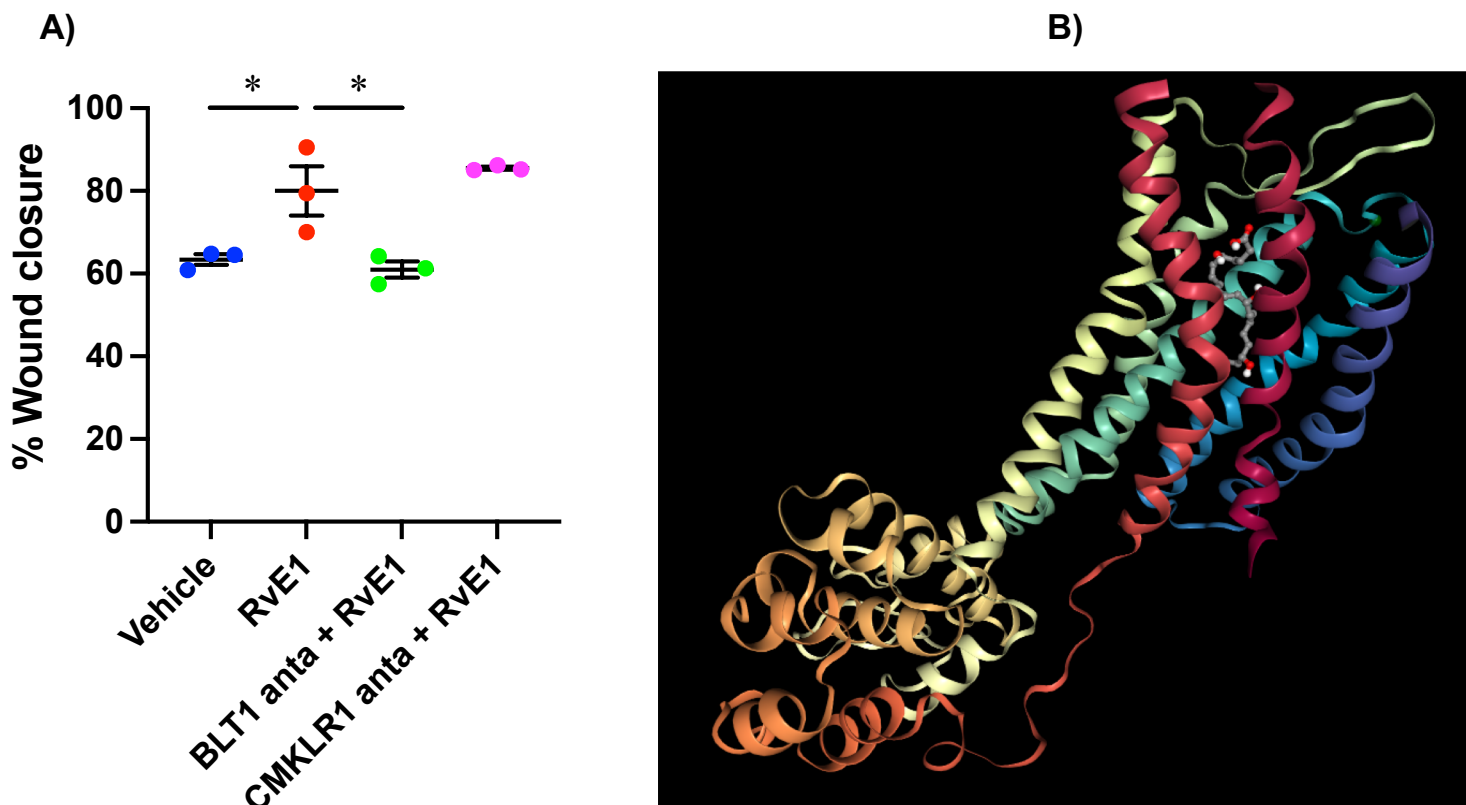

**Figure S1. BLT1 functions as a major epithelial receptor for RvE1.** (A) Effect of BLT1 or CMKLR1 antagonist on the pro-repair activity of RvE1 in the scratch wound assay using murine primary IECs. After scratch wound was produced, IECs were incubated with RvE1 (100 nM) for 24h. BLT1 (1  $\mu$ M) or CMKLR1 (10  $\mu$ M) antagonist was applied 30 min before RvE1 treatment. Quantification of wound repair at 24 h after wounding is shown. The data are presented as the mean  $\pm$  SEM. Statistical analysis was performed using one-way ANOVA followed by post-hoc Welch's t test with Bonferroni's correction. \* $P < 0.05$ . (B) Estimated conformation of the protein-ligand complexes for BLT1 and RvE1 calculated by AutoDock Vina.

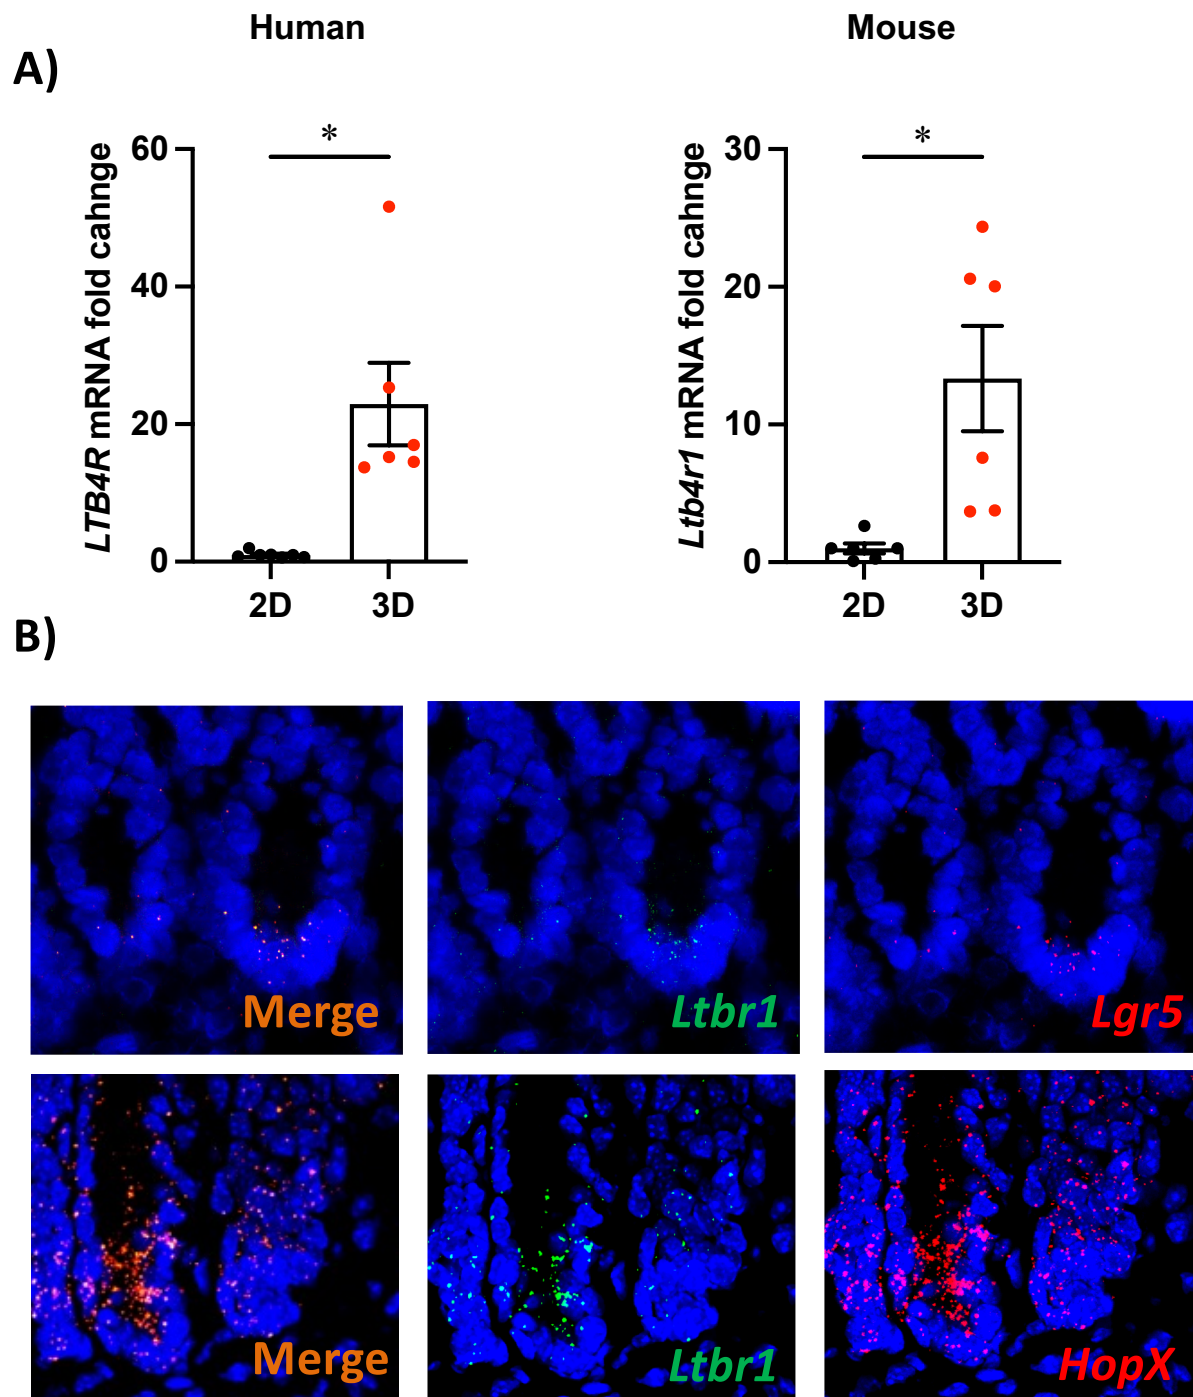

**Figure S2. 3D colonoids have a higher expression of mRNA of BLT1 than 2D colonoids.** (A) qPCR analysis of BLT1 mRNA level in 2D and 3D cultured colonoids of human or mice. The data are presented as the mean  $\pm$  SEM. Statistical analysis was performed using an unpaired (two-tailed) t test with Welch's correction.  $*P < 0.05$ . (B) Intestinal Epithelial BLT1 is expressed at the stem-cell compartment in the colonic crypt base during homeostasis

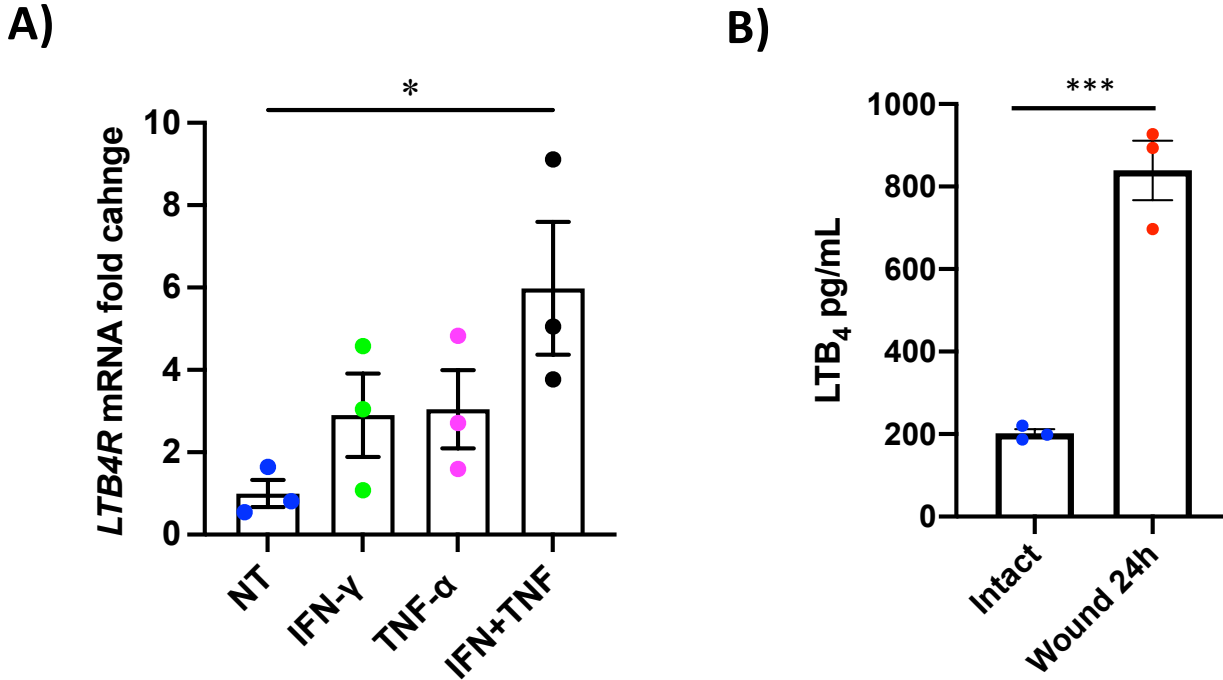

**Figure S3. Inflammatory stimulation increases *LTB4R* mRNA expression in human 3D colonoids and increases in-vivo *LTB4* secretion.** (A) qPCR analysis of the changes in the expression of *LTB4R* mRNA in the human 3D cultured colonoid stimulated with IFN- $\gamma$  (10 ng/ml) and/or TNF- $\alpha$  (10 ng/ml) for 24h. The data are presented as the mean  $\pm$  SEM. Statistical analysis was performed using one-way ANOVA followed by post-hoc Welch's t test with Tukey's correction. \* $P < 0.05$ . (B) A colonic mucosal injury causes a dramatic increase in *LTB4* secretion at the wound bed. Statistical analysis was performed using an unpaired (two-tailed) t test with Welch's correction. \*\*\* $P < 0.001$

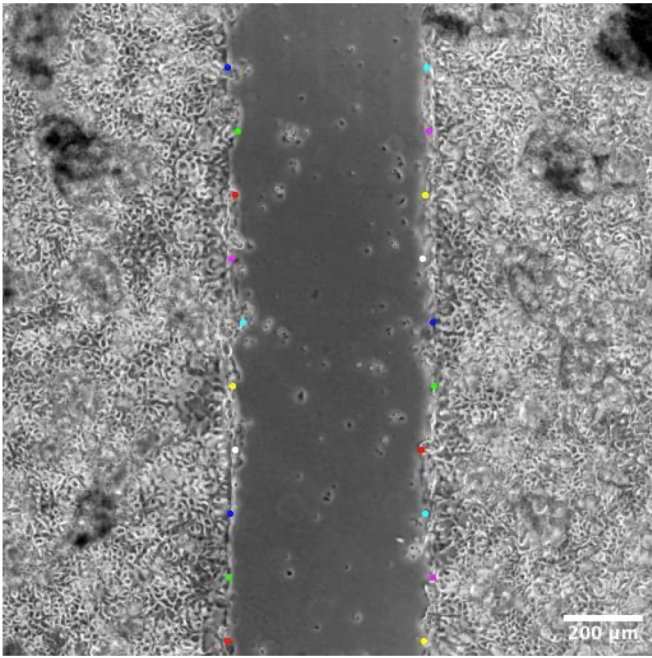

**WT (Vehicle)**

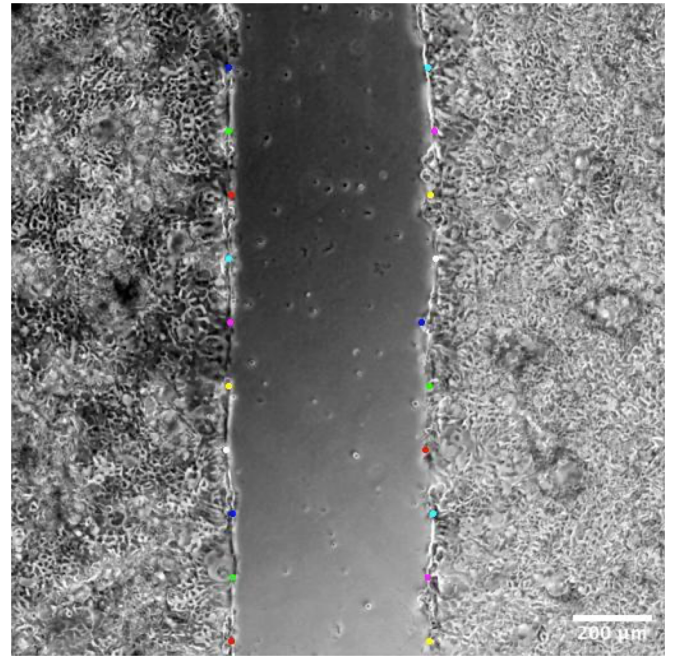

**WT (LTB<sub>4</sub>)**

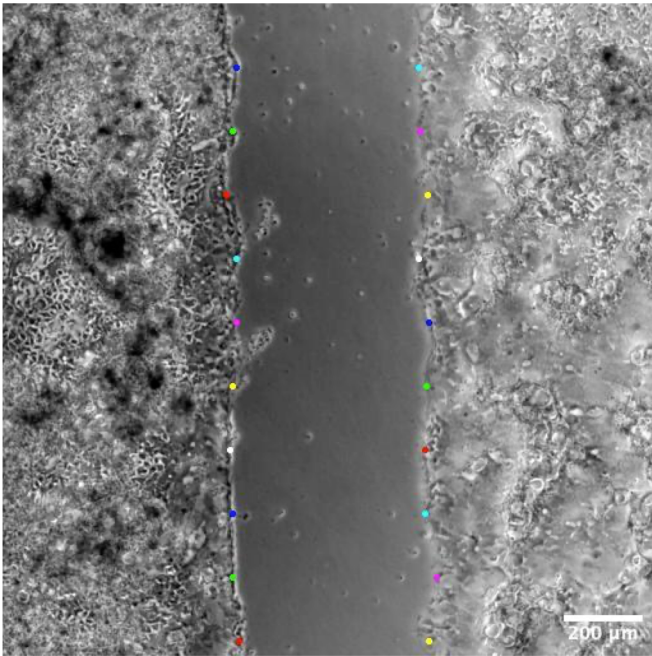

***Ltb4r1*<sup>-/-</sup> (Vehicle)**

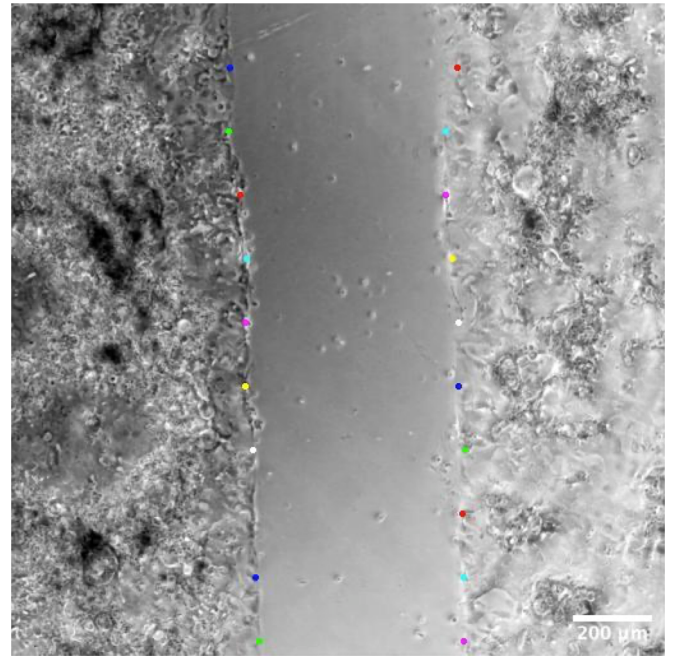

***Ltb4r1*<sup>-/-</sup> (LTB<sub>4</sub>)**

**Figure S4. BLT1 activation promotes migration of IECs.** Representative tracking movies of IEC movement after wounding are shown (see video). Images were taken 30 minutes apart for video microscopy. Scale bar is 200 μm.



**Fig. S5. BLT1 activation promotes proliferation of IECs**

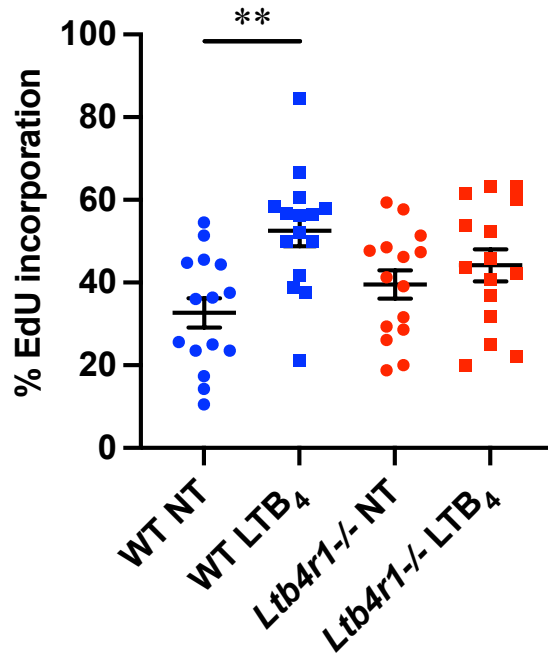

**Figure S5. BLT1 activation promotes proliferation of IECs.** EdU incorporation analysis in the murine 3D cultured colonoids stimulated with LTB<sub>4</sub> (10 nM) for 24h. Comparison of WT and Ltb4r1<sup>-/-</sup> mice. The data are presented as the mean  $\pm$  SEM. Statistical analysis was performed using one-way ANOVA followed by post-hoc Welch's t test with Bonferroni's correction. \*\*P < 0.01.

A)

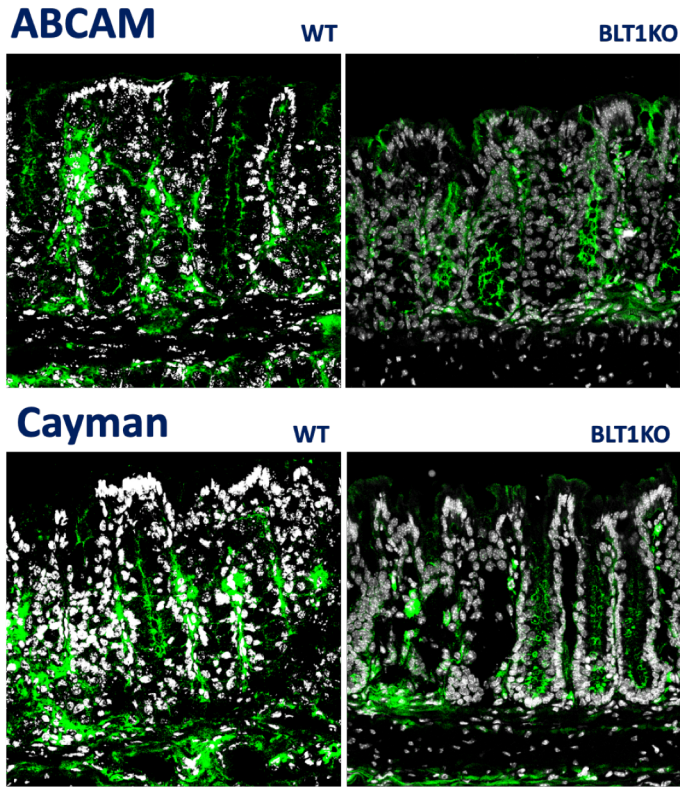

BLT1/Nuclei

B)

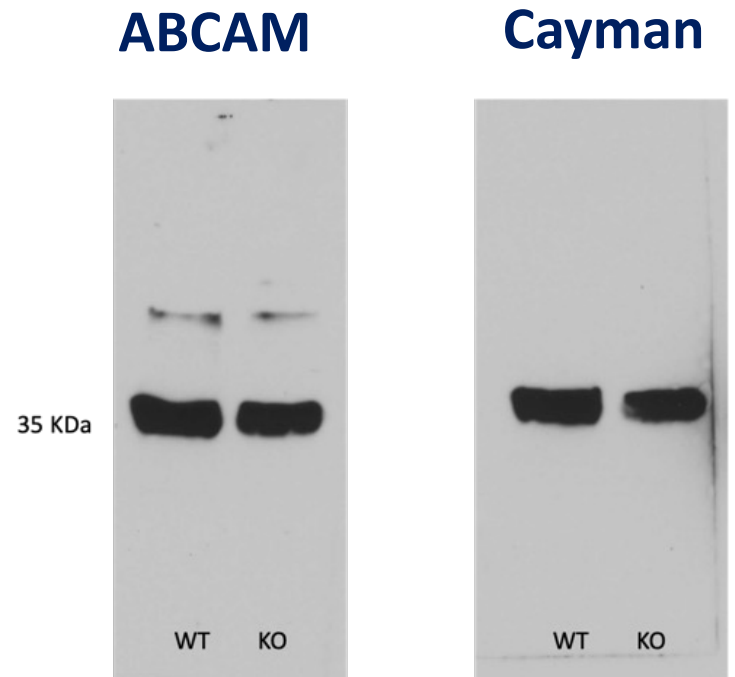

**Fig. S6. BLT1 commercially available antibodies are unspecific.** Commercially available antibodies shown to be unspecific towards BLT1 by immunofluorescence (A) and western blot (B)
